# Supplementary material for: Reduced graphene oxide-polyaniline film as enhanced sensing interface for the detection of loop-mediated-isothermal-amplification products by open circuit potential measurement
Source: Royal Society of Chemistry journal article supplement (doi:10.1039/c8ra04050h), 2018-01-01
Supplement: c8ra04050h1.pdf [file c8ra04050h1.pdf]

*(Supplementary information)*

**Reduced graphene oxide-polyaniline film as enhanced sensing interface for the detection of loop-mediated-isothermal-amplification products by open circuit potential measurement**

Vu Thi Thu<sup>a,b</sup>, Bui Quang Tien<sup>c,d</sup>, Dau Thi Ngoc Nga<sup>a,b</sup>, Ly Cong Thanh<sup>c,e</sup>, Le Hoang Sinh<sup>f</sup>, Tu Cam Le<sup>g</sup>, Tran Dai Lam<sup>b,c,\*</sup>

<sup>a</sup>University of Science and Technology of Hanoi (USTH), Vietnam Academy of Science and Technology (VAST), 18 Hoang Quoc Viet, Cau Giay, Hanoi, Vietnam

<sup>b</sup>Center for High Technology Development (HTD), Vietnam Academy of Science and Technology (VAST), 18 Hoang Quoc Viet, Cau Giay, Hanoi, Vietnam

<sup>c</sup>Graduate University of Science and Technology (GUST), Vietnam Academy of Science and Technology (VAST), 18 Hoang Quoc Viet, Cau Giay, Hanoi, Vietnam

<sup>d</sup>Military Academy of Logistics, Ngoc Thuy, Long Bien, Hanoi, Vietnam

<sup>e</sup>Hanoi University of Pharmacy, 15-17 Le Thanh Tong, Hoan Kiem, Hanoi, Vietnam

<sup>f</sup>Duy Tan University, 254 Nguyen Van Linh, Thanh Khe, Da Nang, Vietnam

<sup>g</sup>School of Engineering, RMIT University, GPO Box 2476, Melbourne, VIC 3001, Australia

- Corresponding authors: [trandailam@gmail.com](mailto:trandailam@gmail.com)

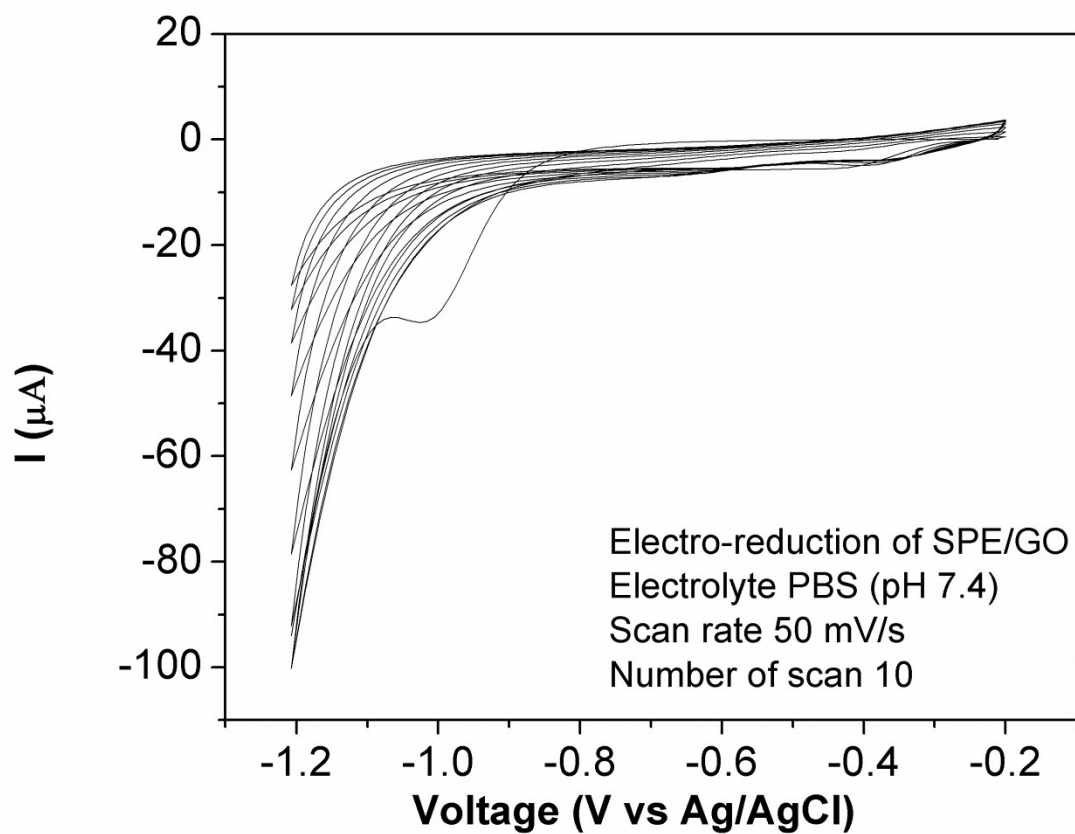

**Fig 1S. Electro-reduction of graphene oxide coated SPE:** The graphene oxide film was electrochemically reduced by sweeping in PBS solution (pH 7.4) at scan rate of 50 mV/s for several scans.

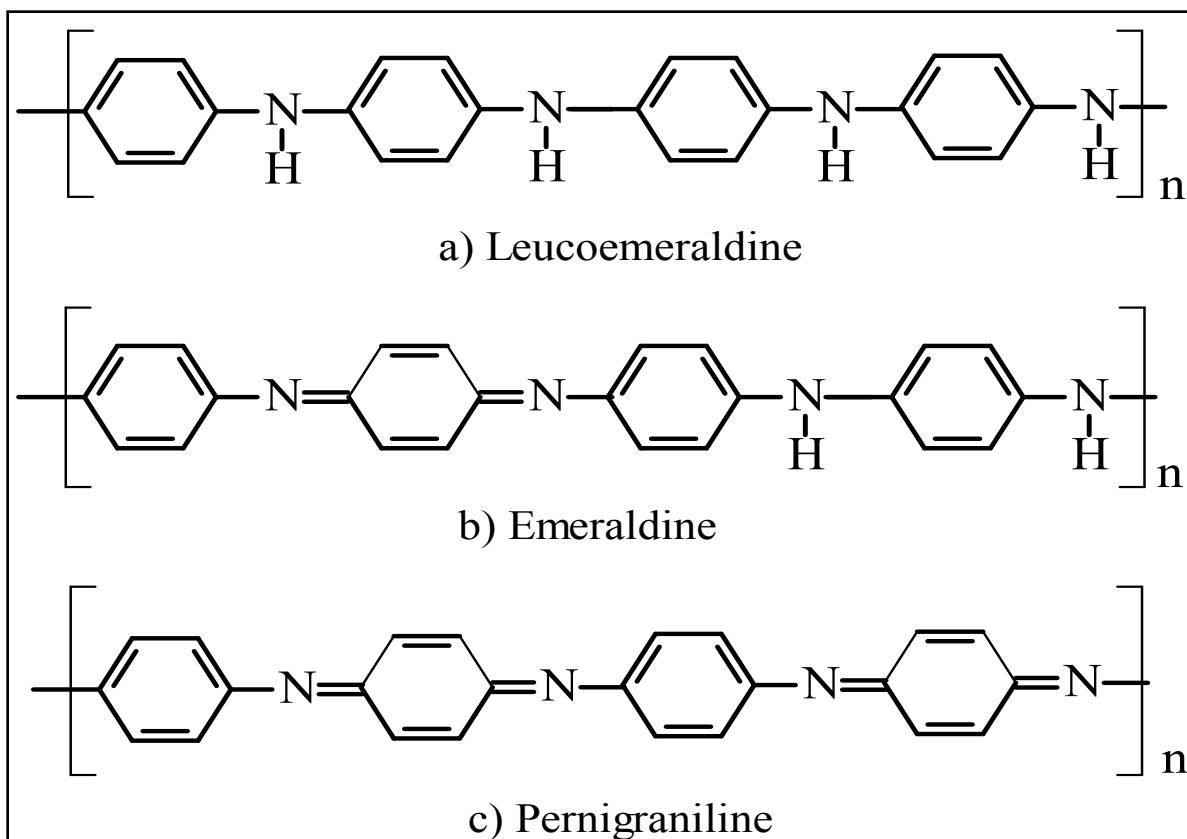

**Fig 2S. The available states of polyaniline:** Leucoemeraldine (transparent, poorly conductive), Emeraldine (green, conductive), and Pernigraniline (dark blue, poorly conductive). The emeraldine base can be transformed reversibly into emeraldine salt ( $H^+$  doping or protonation process).

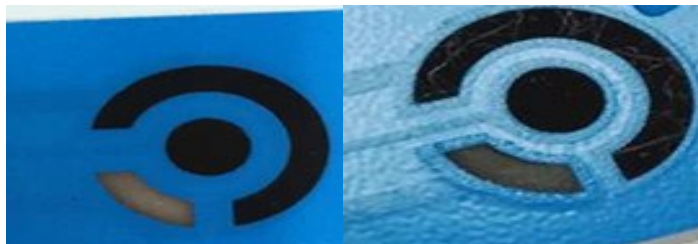

**Fig 3S. Photos of screen printed electrodes before (left) and after (right) deposition of rGO/PANi film:** The rGO/PANi film is porous and in dark color.

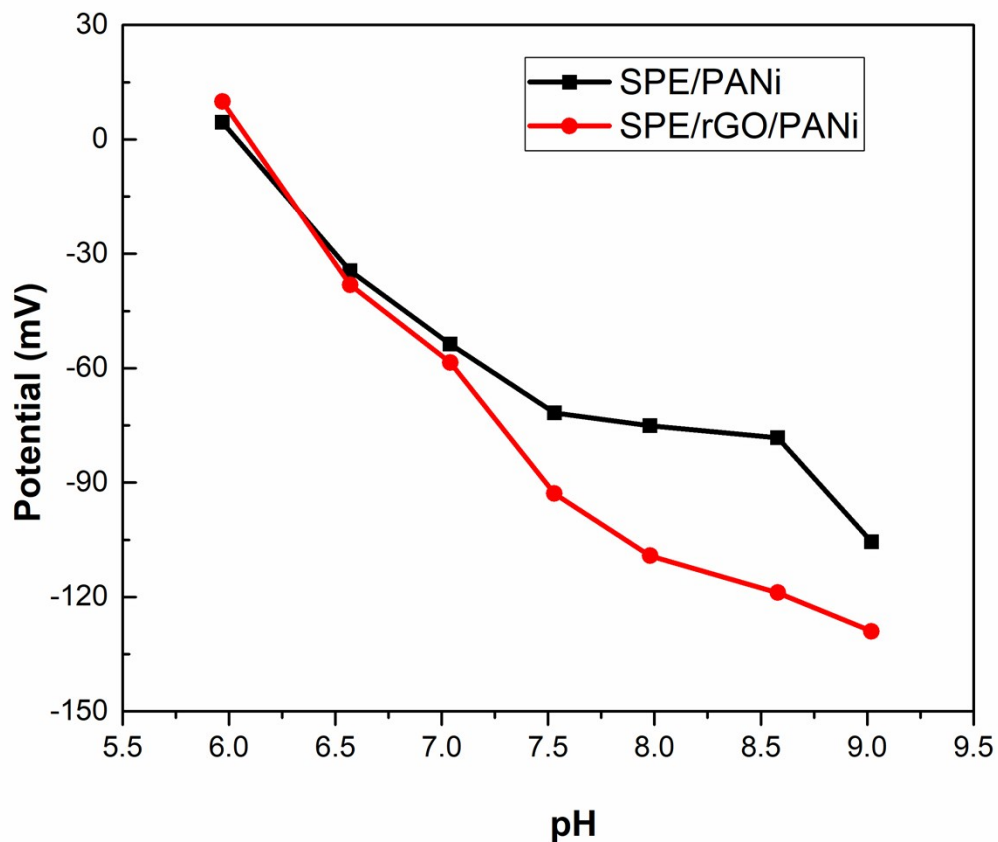

**Fig 4S. pH calibration curve of SPE/PANi (black) and SPE/rGO-PANi (red) electrode:** The equilibrium potential increases with decreasing pH due to the protonation of emeraldine base form of polyaniline. pH range 6.0 – 9.0 (buffered PBS solution). The presence of rGO film has promoted charge exchange at the interface.

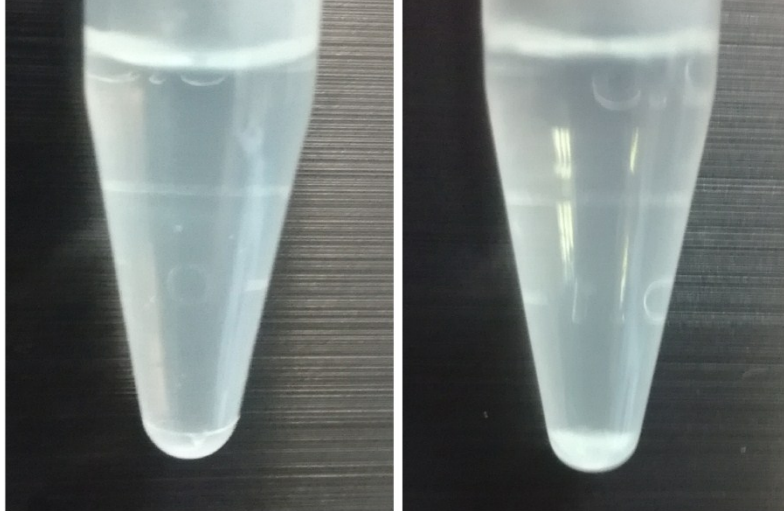

**Fig 5S. Photos LAMP products for negative sample (left) and positive sample (right):** The white precipitate for positive sample is an indicator for an effective gene amplification. The transparent solution was obtained for negative sample.
